# Supplementary material
Source: MDPI journal article supplement (https://www.mdpi.com/2075-163X/8/7/308)
Supplement: s1 [file s1]

data_sharyginite


_audit_creation_method                   'Jana2006 Version : 20/01/2017'


# 5. CHEMICAL DATA

_chemical_name_mineral                   sharyginite
_chemical_compound_source                'Bellerberg, Eifel, Germany'

_chemical_formula_sum                    'Al0.32 Ca3 Fe1.68 O8 Ti1'
_chemical_formula_weight                 398.6


#=======================================================================

# 6. CRYSTAL DATA

_symmetry_cell_setting                   orthorhombic
_symmetry_space_group_name_H-M           'P 21 m a'
_symmetry_space_group_name_Hall          'P 2xa;-2y;-2za'
_symmetry_Int_Tables_number              26

loop_
 _space_group_symop_id
 _space_group_symop_operation_xyz
 1   x,y,z
 2   x+1/2,-y,-z
 3   x+1/2,y,-z
 4   x,-y,z

_cell_length_a                           5.4230(15)
_cell_length_b                           11.150(8)
_cell_length_c                           5.5280(19)
_cell_angle_alpha                        90
_cell_angle_beta                         90
_cell_angle_gamma                        90
_cell_volume                             334.3(3)

loop_
 _twin_individual_id
 _twin_individual_mass_fraction_refined
 _twin_individual_twin_matrix_11
 _twin_individual_twin_matrix_12
 _twin_individual_twin_matrix_13
 _twin_individual_twin_matrix_21
 _twin_individual_twin_matrix_22
 _twin_individual_twin_matrix_23
 _twin_individual_twin_matrix_31
 _twin_individual_twin_matrix_32
 _twin_individual_twin_matrix_33
1 0.51(3)
1 0 0
0 1 0
0 0 1
2 0.49(3)
-1 0 0
0 -1 0
0 0 -1

_cell_formula_units_Z                    2

_cell_measurement_reflns_used            1587
_cell_measurement_theta_min              1.82
_cell_measurement_theta_max              32.02
_cell_measurement_temperature            293
_cell_special_details
;
 XDS CORRECT Version 2016-05-01
;

_exptl_crystal_density_diffrn            3.9426
_exptl_crystal_density_meas              ?
_exptl_crystal_density_method            ?
_exptl_crystal_F_000                     386

_exptl_absorpt_coefficient_mu            6.792
_exptl_crystal_description               fragment
_exptl_crystal_size_max                  0.06
_exptl_crystal_size_mid                  0.04
_exptl_crystal_size_min                  0.04

_exptl_crystal_colour                    'dark-brown'
_exptl_absorpt_correction_type           empirical
_exptl_absorpt_process_details
;  XDS CORRECT Version 2016-05-01
;

#=======================================================================

# 7. EXPERIMENTAL DATA

_diffrn_ambient_temperature      293
_diffrn_source                   synchrotron
_diffrn_radiation_source         'SLS super-bending magnet 2.9T, X06DA'
_diffrn_radiation_wavelength     0.7085
_diffrn_radiation_monochromator
;Bartels Monochromator with dual channel cut crystals (DCCM) 
 in (+--+) geometry
;
_diffrn_measurement_device       'multi-axis goniometer'
_diffrn_measurement_device_type  PRIGo
_diffrn_detector                 'hybrid pixel CMOS'
_diffrn_detector_type            PILATUS2M-F
_diffrn_detector_area_resol_mean 5.81
_diffrn_measurement_method       'rotation method'
_diffrn_measurement_specimen_support fiber
_diffrn_measurement_details      
;
 Swiss Light Source, Paul Scherrer Insitute, Villigen, Switzerland
 Beamline X06DA (PXIII)
 single omega-scan
 1800 frames, detector distance = 120 mm
 oscillation 0.1 deg, 0.1 sec exposure
 vertical detector offset 67 mm
;

_diffrn_reflns_number                    1810
_diffrn_reflns_theta_min                 1.82
_diffrn_reflns_theta_max                 32.02
_diffrn_reflns_theta_full                27.35
_diffrn_measured_fraction_theta_max      0.88
_diffrn_measured_fraction_theta_full     0.98
_diffrn_reflns_av_R_equivalents          0.0257
_diffrn_reflns_av_unetI/netI             0.0308
_diffrn_reflns_limit_h_min               -7
_diffrn_reflns_limit_h_max               7
_diffrn_reflns_limit_k_min               -16
_diffrn_reflns_limit_k_max               10
_diffrn_reflns_limit_l_min               -7
_diffrn_reflns_limit_l_max               7
_diffrn_reflns_reduction_process
;
 XDS Version 2016-05-01
 incl. DECAY, MODULATION, and ABSORPTION
;

_diffrn_radiation_probe                  X-ray

#=======================================================================

# 8. REFINEMENT DATA

_reflns_number_total                     951
_reflns_number_gt                        943
_reflns_threshold_expression             'I>3\s(I)'

_refine_ls_structure_factor_coef         F
_refine_ls_R_factor_gt                   0.0241
_refine_ls_wR_factor_gt                  0.0338
_refine_ls_R_factor_all                  0.0242
_refine_ls_wR_factor_ref                 0.0338
_refine_ls_goodness_of_fit_ref           1.62
_refine_ls_goodness_of_fit_gt            1.62
_refine_ls_number_reflns                 951
_refine_ls_number_parameters             74
_refine_ls_number_restraints             0
_refine_ls_number_constraints            25
_refine_ls_weighting_scheme              sigma
_refine_ls_weighting_details             'w=1/(\s^2^(F)+0.0001F^2^)'
_refine_ls_shift/su_max                  0.0033
_refine_ls_shift/su_mean                 0.0008
_refine_diff_density_max                 0.49
_refine_diff_density_min                 -0.62
_refine_ls_extinction_method
 'B-C type 1 Gaussian isotropic (Becker & Coppens, 1974)'
_refine_ls_extinction_coef               170(60)
_refine_ls_abs_structure_details
;  352 of Friedel pairs used in the refinement
;
_refine_ls_abs_structure_Flack            0.49(3)


loop_
 _atom_type_symbol
 _atom_type_scat_dispersion_real
 _atom_type_scat_dispersion_imag
 _atom_type_scat_source
 Al   0.0654  0.0523
 'International Tables Vol C tables 4.2.6.8 and 6.1.1.1'
 Ca   0.2283  0.3092
 'International Tables Vol C tables 4.2.6.8 and 6.1.1.1'
 Fe   0.3481  0.8483
 'International Tables Vol C tables 4.2.6.8 and 6.1.1.1'
 O    0.0113  0.0062
 'International Tables Vol C tables 4.2.6.8 and 6.1.1.1'
 Ti   0.2797  0.4493
 'International Tables Vol C tables 4.2.6.8 and 6.1.1.1'

_computing_cell_refinement       'XDS'
_computing_data_reduction        'XDS'
_computing_structure_refinement  'Jana2006'


#=======================================================================

# 9. ATOMIC COORDINATES AND DISPLACEMENT PARAMETERS

loop_
 _atom_site_label
 _atom_site_type_symbol
 _atom_site_fract_x
 _atom_site_fract_y
 _atom_site_fract_z
 _atom_site_adp_type
 _atom_site_U_iso_or_equiv
 _atom_site_site_symmetry_multiplicity
 _atom_site_occupancy
 _atom_site_calc_flag
 _atom_site_refinement_flags
 _atom_site_disorder_assembly
 _atom_site_disorder_group
  Ti1 Ti 0.25010(10) 0.16862(4) 0.23966(9) Uani 0.00672(15) 4 0.5 d . . .
  Fe1 Fe 0.25010(10) 0.16862(4) 0.23966(9) Uani 0.00672(15) 4 0.465(5) d . . .
  Al1 Al 0.25010(10) 0.16862(4) 0.23966(9) Uani 0.00672(15) 4 0.035(5) d . . .
  Fe2 Fe 0.19825(16) 0.5 0.18318(13) Uani 0.00750(19) 2 0.751(7) d . . .
  Al2 Al 0.19825(16) 0.5 0.18318(13) Uani 0.00750(19) 2 0.249(7) d . . .
  Ca1 Ca -0.26824(16) 0.31319(6) 0.27602(11) Uani 0.01048(18) 4 1 d . . .
  Ca2 Ca 0.2676(3) 0 -0.26624(16) Uani 0.0141(3) 2 1 d . . .
  O1 O 0.2758(5) 0.35744(18) 0.3210(3) Uani 0.0136(6) 4 1 d . . .
  O2 O 0.3553(6) 0.5 -0.1222(5) Uani 0.0127(8) 2 1 d . . .
  O3 O 0.0161(4) 0.15042(14) 0.5135(5) Uani 0.0105(5) 4 1 d . . .
  O4 O 0.2444(6) 0 0.1700(5) Uani 0.0132(8) 2 1 d . . .
  O5 O -0.0146(5) 0.20160(16) 0.0157(5) Uani 0.0127(6) 4 1 d . . .

loop_
 _atom_site_aniso_label
 _atom_site_aniso_type_symbol
 _atom_site_aniso_U_11
 _atom_site_aniso_U_22
 _atom_site_aniso_U_33
 _atom_site_aniso_U_12
 _atom_site_aniso_U_13
 _atom_site_aniso_U_23
 Ti1 Ti 0.0055(3) 0.0109(2) 0.0038(3) -0.0001(3) -0.00028(18) 0.00037(14)
 Fe1 Fe 0.0055(3) 0.0109(2) 0.0038(3) -0.0001(3) -0.00028(18) 0.00037(14)
 Al1 Al 0.0055(3) 0.0109(2) 0.0038(3) -0.0001(3) -0.00028(18) 0.00037(14)
 Fe2 Fe 0.0071(4) 0.0094(3) 0.0060(4) 0 0.0003(3) 0
 Al2 Al 0.0071(4) 0.0094(3) 0.0060(4) 0 0.0003(3) 0
 Ca1 Ca 0.0131(4) 0.0115(3) 0.0069(3) -0.0012(4) 0.0015(3) -0.00057(18)
 Ca2 Ca 0.0166(6) 0.0142(4) 0.0116(4) 0 -0.0004(4) 0
 O1 O 0.0176(12) 0.0131(9) 0.0099(9) 0.0016(8) -0.0004(9) 0.0011(7)
 O2 O 0.0128(15) 0.0130(13) 0.0124(14) 0 0.0032(13) 0
 O3 O 0.0105(9) 0.0129(7) 0.0080(9) 0.0001(8) 0.0014(8) -0.0008(8)
 O4 O 0.0159(17) 0.0122(12) 0.0115(13) 0 -0.0009(13) 0
 O5 O 0.0134(11) 0.0177(8) 0.0071(9) 0.0007(8) -0.0022(8) -0.0005(9)

# 10. MOLECULAR GEOMETRY


loop_
 _geom_bond_atom_site_label_1
 _geom_bond_atom_site_label_2
 _geom_bond_site_symmetry_1
 _geom_bond_site_symmetry_2
 _geom_bond_distance
 _geom_bond_publ_flag
  Ti1 Fe1 . . 0 ?
  Ti1 Al1 . . 0 ?
  Ti1 O1 . . 2.157(4) ?
  Ti1 O3 . . 1.985(3) ?
  Ti1 O3 . 3_556 1.996(3) ?
  Ti1 O4 . . 1.919(3) ?
  Ti1 O5 . . 1.931(3) ?
  Ti1 O5 . 3_555 1.938(3) ?
  Fe1 Al1 . . 0 ?
  Fe1 O1 . . 2.157(4) ?
  Fe1 O3 . . 1.985(3) ?
  Fe1 O3 . 3_556 1.996(3) ?
  Fe1 O4 . . 1.919(3) ?
  Fe1 O5 . . 1.931(3) ?
  Fe1 O5 . 3_555 1.938(3) ?
  Al1 O1 . . 2.157(4) ?
  Al1 O3 . . 1.985(3) ?
  Al1 O3 . 3_556 1.996(3) ?
  Al1 O4 . . 1.919(3) ?
  Al1 O5 . . 1.931(3) ?
  Al1 O5 . 3_555 1.938(3) ?
  Fe2 Al2 . . 0 ?
  Fe2 O1 . . 1.812(3) ?
  Fe2 O1 . 4_565 1.812(3) ?
  Fe2 O2 . . 1.891(3) ?
  Fe2 O2 . 2_465 1.890(3) ?
  Al2 O1 . . 1.812(3) ?
  Al2 O1 . 4_565 1.812(3) ?
  Al2 O2 . . 1.891(3) ?
  Al2 O2 . 2_465 1.890(3) ?
  Ca1 O1 . 1_455 2.534(3) ?
  Ca1 O1 . 3_456 2.294(3) ?
  Ca1 O2 . 2_465 2.347(3) ?
  Ca1 O3 . . 2.719(3) ?
  Ca1 O3 . 3_456 2.453(3) ?
  Ca1 O5 . . 2.348(3) ?
  Ca1 O5 . 3_455 2.436(3) ?
  Ca2 O3 . 1_554 2.481(3) ?
  Ca2 O3 . 2_555 2.549(3) ?
  Ca2 O3 . 3_555 2.549(3) ?
  Ca2 O3 . 4_554 2.481(3) ?
  Ca2 O4 . . 2.415(3) ?
  Ca2 O4 . 2_455 2.887(4) ?
  Ca2 O4 . 2_555 2.640(4) ?
  Ca2 O5 . 2_555 2.892(3) ?
  Ca2 O5 . 3_555 2.892(3) ?
  O1 O2 . . 2.952(4) ?
  O1 O2 . 2_465 2.989(4) ?
  O1 O3 . . 2.906(4) ?
  O1 O3 . 3_556 2.804(4) ?
  O1 O5 . . 2.889(4) ?
  O1 O5 . 3_555 2.789(4) ?
  O3 O3 . 3_456 2.716(4) ?
  O3 O3 . 3_556 2.716(4) ?
  O3 O4 . . 2.820(4) ?
  O3 O4 . 2_456 2.837(4) ?
  O3 O5 . . 2.815(4) ?
  O3 O5 . 1_556 2.839(4) ?
  O4 O5 . . 2.784(4) ?
  O4 O5 . 2_555 2.795(4) ?
  O4 O5 . 3_555 2.795(4) ?
  O4 O5 . 4_555 2.784(4) ?
  O5 O5 . 3_455 2.717(4) ?
  O5 O5 . 3_555 2.717(4) ?

# 11. STRUCTURE-FACTOR LIST

loop_
 _refln_index_h
 _refln_index_k
 _refln_index_l
 _refln_F_squared_calc
 _refln_F_squared_meas
 _refln_F_squared_sigma
 _refln_observed_status
  -2   0   0 31064.30 33018.90   859.16 o
  -4   0   0 18779.90 19636.50   515.63 o
  -6   0   0  2725.58  2860.38   112.58 o
   0   1   0   302.26   307.98     8.49 o
   2   1   0   349.53   324.71    14.31 o
  -2   1   0   348.15   336.10     8.57 o
  -4   1   0  2213.85  2257.70    62.28 o
  -6   1   0  1105.15  1199.00    49.73 o
   0   2   0   761.90   813.65    21.92 o
   2   2   0   147.99   179.75     5.99 o
  -2   2   0   147.51   174.73     8.38 o
   4   2   0  1519.98  1424.62    58.00 o
  -4   2   0  1521.81  1534.33    35.36 o
  -6   2   0   473.82   500.58    16.67 o
   0   3   0  2329.92  2309.90    62.65 o
  -2   3   0  1532.20  1637.71    44.20 o
   4   3   0   350.68   337.63    16.35 o
  -4   3   0   351.75   378.53    12.75 o
  -6   3   0   373.23   410.02    14.13 o
   0   4   0   494.17   442.78    13.69 o
   2   4   0   549.62   532.68    16.18 o
  -2   4   0   548.61   526.92    16.06 o
  -4   4   0   604.66   573.10    18.26 o
  -6   4   0   234.75   241.76    13.86 o
   0   5   0    35.01    45.93     2.59 o
   2   5   0   983.59   958.69    27.88 o
  -2   5   0   982.49   921.65    27.19 o
   4   5   0  1751.06  1693.49    68.16 o
  -4   5   0  1752.99  1715.96    48.91 o
   6   5   0  1570.39  1450.93    60.67 o
  -6   5   0  1568.61  1764.08    70.67 o
   0   6   0 36925.40 37333.80   989.52 o
   2   6   0 15520.10 15204.70   409.14 o
  -2   6   0 15519.70 14786.30   564.14 o
   4   6   0  8218.74  8126.40   310.25 o
  -4   6   0  8215.64  8386.37   224.25 o
   6   6   0  1960.19  1703.04    71.28 o
   0   7   0   375.64   371.60    12.14 o
   2   7   0   566.13   590.55    18.04 o
  -2   7   0   567.55   565.01    24.66 o
   4   7   0  1469.71  1432.47    58.60 o
  -4   7   0  1471.00  1423.87    58.49 o
   6   7   0   954.81   871.38    38.63 o
  -6   7   0   956.50   970.24    42.12 o
   0   8   0    77.78    96.03     4.68 o
   2   8   0    77.69    91.69     6.51 o
  -2   8   0    78.18    91.52     4.62 o
   4   8   0   773.80   764.03    33.48 o
  -4   8   0   775.71   796.37    34.57 o
   6   8   0   602.02   534.71    25.79 o
  -6   8   0   603.01   584.81    27.72 o
   0   9   0  1166.23  1256.63    50.69 o
   2   9   0   534.69   570.57    25.36 o
  -2   9   0   535.20   562.97    25.24 o
   4   9   0   255.52   262.74    14.37 o
  -4   9   0   256.09   255.91    14.06 o
   6   9   0   222.49   212.45    13.25 o
  -6   9   0   223.52   207.24    12.94 o
   0  10   0  1608.95  1701.59    67.66 o
   2  10   0  1012.03  1039.54    43.49 o
  -2  10   0  1010.91  1014.85    42.70 o
  -4  10   0   613.97   611.79    27.97 o
  -6  10   0   159.83   152.70    10.68 o
   0  11   0    29.12    32.46     4.08 o
   2  11   0   341.82   344.41    17.54 o
  -2  11   0   342.40   334.68    17.09 o
   4  11   0   757.02   727.01    32.58 o
  -4  11   0   757.19   685.32    31.30 o
   0  12   0  3740.50  4113.95   157.04 o
   2  12   0  3281.90  3453.30   133.80 o
  -2  12   0  3280.93  3018.64   120.21 o
   4  12   0  1205.20  1172.50    49.67 o
  -4  12   0  1204.25  1098.34    47.24 o
   0  13   0   645.27   664.31    29.81 o
   2  13   0   606.05   641.45    28.95 o
  -2  13   0   607.14   494.73    24.11 o
   4  13   0   982.71   971.12    42.02 o
  -4  13   0   983.92   889.24    39.30 o
   0  14   0    43.71    50.70     5.35 o
   2  14   0    89.85    77.28     6.94 o
  -2  14   0    90.22    78.56     7.53 o
   0  15   0   909.76   966.80    40.91 o
   2  15   0  1054.50  1076.87    45.48 o
  -2  15   0  1053.98   902.09    39.94 o
   0  16   0   853.85   913.04    38.85 o
   2  16   0   868.07  1069.90    45.37 o
   0   0   1   157.01   156.05     4.70 o
   1   0   1  2228.66  2294.89    61.11 o
  -1   0   1  2228.93  2267.26    60.69 o
   2   0   1    33.26   118.95     6.42 o
  -2   0   1    33.04    38.00     1.94 o
   3   0   1  1264.82  1182.37    48.36 o
  -3   0   1  1264.37  1266.50    35.67 o
  -4   0   1   335.34   317.67     9.03 o
  -5   0   1   218.64   228.22     8.80 o
  -6   0   1    31.33    38.17     3.22 o
  -7   0   1    46.25    57.00     6.02 o
   0   1   1   295.70   287.54     5.99 o
   1   1   1    72.01    74.40     2.97 o
  -1   1   1    72.09    77.13     1.82 o
   2   1   1    63.72    70.99     3.20 o
  -2   1   1    64.02    73.11     1.78 o
   3   1   1   124.47   116.15     7.20 o
  -3   1   1   124.53   127.15     3.30 o
  -4   1   1    34.46    35.79     1.53 o
  -5   1   1   239.49   248.42     5.35 o
  -6   1   1   180.99   192.07     5.78 o
  -7   1   1   493.82   566.87    14.99 o
   0   2   1   517.22   525.09    10.40 o
   1   2   1   599.87   591.78    11.97 o
  -1   2   1   599.82   569.24    11.84 o
   2   2   1   935.15   989.13    22.08 o
  -2   2   1   934.50   992.86    39.49 o
   3   2   1  2055.73  2083.06    57.34 o
  -3   2   1  2054.51  2000.94    39.96 o
  -4   2   1    29.93    32.46     1.35 o
   5   2   1  1357.70  1260.80    52.76 o
  -5   2   1  1356.04  1424.26    28.11 o
  -6   2   1   172.61   197.70     5.75 o
  -7   2   1   862.00  1030.99    24.16 o
   0   3   1  1641.10  1570.07    31.29 o
   1   3   1 22563.40 21574.20   481.52 o
  -1   3   1 22558.30 22036.80   422.28 o
   2   3   1  1015.61   999.57    20.19 o
  -2   3   1  1014.31   981.07    20.08 o
   3   3   1 13399.10 13941.60   367.29 o
  -3   3   1 13399.80 13119.50   226.25 o
   4   3   1   209.88   205.05     6.43 o
  -4   3   1   210.09   204.88     5.59 o
   5   3   1  4752.13  4307.11   169.81 o
  -5   3   1  4752.61  5027.00    93.05 o
  -6   3   1     8.67    10.99     1.44 o
  -7   3   1  1469.68  1729.22    48.10 o
   0   4   1  3045.66  3029.35    58.23 o
   1   4   1  2091.44  2030.95    40.11 o
  -1   4   1  2091.84  2032.41    46.07 o
   2   4   1     7.37     8.61     1.28 o
   3   4   1  2076.58  2067.34    40.62 o
  -3   4   1  2076.70  2052.97    40.73 o
   4   4   1   155.89   155.18     5.29 o
  -4   4   1   155.38   160.29     5.42 o
  -5   4   1  1466.94  1548.99    35.33 o
   6   4   1   140.19   134.72     9.31 o
  -6   4   1   140.33   157.81     5.84 o
  -7   4   1   862.21   944.18    28.72 o
   0   5   1    69.78    70.22     2.81 o
   1   5   1  1907.36  1844.93    36.85 o
  -1   5   1  1907.79  1859.14    42.55 o
   2   5   1   254.92   263.55     7.42 o
  -2   5   1   254.59   254.43     6.22 o
   3   5   1  1266.70  1274.90    25.66 o
  -3   5   1  1267.32  1255.66    36.29 o
   4   5   1   205.26   197.54     7.81 o
  -4   5   1   205.75   207.08     6.55 o
   5   5   1   939.94   889.38    38.60 o
  -5   5   1   941.32   977.16    23.66 o
   6   5   1    50.73    41.92     4.79 o
  -6   5   1    50.63    47.46     5.55 o
  -7   5   1   922.35   978.29    29.96 o
   0   6   1    16.86    19.60     1.35 o
   1   6   1  1485.37  1483.33    29.49 o
  -1   6   1  1485.76  1441.45    33.65 o
   2   6   1   182.92   177.18     5.59 o
  -2   6   1   182.57   213.40     7.71 o
   3   6   1  1105.97  1108.58    32.05 o
  -3   6   1  1106.19  1055.42    22.41 o
   4   6   1   148.24   141.12     6.35 o
  -4   6   1   148.60   142.90     5.24 o
   5   6   1   312.24   290.27    15.20 o
  -5   6   1   311.94   305.11     9.26 o
   6   6   1    13.61    14.48     2.90 o
  -6   6   1    13.60    19.17     2.72 o
  -7   6   1    63.66    63.99     6.47 o
   0   7   1  1103.49  1029.28    21.96 o
   1   7   1  1375.06  1306.98    27.19 o
  -1   7   1  1374.85  1273.54    26.95 o
   2   7   1   258.41   244.01     6.54 o
  -2   7   1   258.96   243.16     8.90 o
   3   7   1   632.06   631.06    19.53 o
  -3   7   1   630.90   610.80    15.73 o
   4   7   1   132.65   134.89     6.29 o
  -4   7   1   132.37   131.65     6.05 o
   5   7   1   103.82   103.19     5.46 o
  -5   7   1   103.15   106.17     5.69 o
   6   7   1   206.35   201.02     8.81 o
  -6   7   1   206.65   223.35     9.53 o
   7   7   1    56.87    34.85     4.57 o
   0   8   1    18.40    18.49     1.62 o
   1   8   1   545.10   525.60    12.00 o
  -1   8   1   544.51   544.37    14.07 o
   2   8   1   405.60   413.41    13.75 o
  -2   8   1   405.21   383.92    10.69 o
   3   8   1  1022.31  1051.10    30.70 o
  -3   8   1  1020.62   999.32    24.37 o
   4   8   1    89.77    92.03     5.02 o
  -4   8   1    90.11    90.49     4.94 o
   5   8   1   757.58   739.87    23.34 o
  -5   8   1   755.81   814.42    25.43 o
   6   8   1   111.72   112.14     8.35 o
  -6   8   1   111.49   111.20     8.86 o
   0   9   1    58.15    71.06     4.03 o
   1   9   1  6283.30  6377.88   171.43 o
  -1   9   1  6283.52  6253.03   138.34 o
   2   9   1   389.57   384.58    13.17 o
  -2   9   1   389.14   369.50    10.50 o
   3   9   1  4224.60  4383.48   118.26 o
  -3   9   1  4224.88  4118.77   114.00 o
   4   9   1    37.94    34.34     3.08 o
  -4   9   1    38.21    33.66     3.08 o
   5   9   1  1787.09  1691.28    49.61 o
  -5   9   1  1786.37  1696.86    49.89 o
   6   9   1    30.64    30.42     4.18 o
  -6   9   1    30.55    31.53     3.32 o
   0  10   1   689.73   708.42    21.84 o
   1  10   1  1411.64  1457.61    41.47 o
  -1  10   1  1411.84  1463.57    41.67 o
   2  10   1    74.10    90.83     4.86 o
  -2  10   1    74.31    90.49     7.02 o
   3  10   1  1230.07  1277.62    52.40 o
  -3  10   1  1230.65  1221.31    35.99 o
   4  10   1    84.48    87.00     5.02 o
  -4  10   1    84.16    81.12     4.96 o
  -5  10   1   962.57   890.96    28.17 o
  -6  10   1   124.34   120.57     9.47 o
   0  11   1     1.47     3.24     2.21 <
   1  11   1   821.96   989.90    41.64 o
  -1  11   1   822.21   806.24    24.87 o
   2  11   1    58.52    65.95     4.23 o
  -2  11   1    58.35    59.13     4.00 o
   3  11   1   708.37   728.29    22.68 o
   4  11   1    46.01    47.46     3.74 o
  -4  11   1    46.20    42.60     3.59 o
   5  11   1   635.92   602.48    27.98 o
  -5  11   1   636.79   580.73    19.72 o
   0  12   1    19.32    21.73     3.57 o
   1  12   1   933.64  1079.04    30.97 o
  -1  12   1   934.06   961.36    28.84 o
   2  12   1   206.96   220.46    12.81 o
   3  12   1   868.78   910.55    38.96 o
  -3  12   1   869.55   796.54    25.36 o
   4  12   1    19.42    19.17     2.56 o
  -4  12   1    19.58    16.36     2.48 o
  -5  12   1   485.00   442.35    22.48 o
   0  13   1   305.30   301.69    11.36 o
   1  13   1  1003.75  1125.51    32.53 o
  -1  13   1  1003.62   869.71    38.54 o
   2  13   1    12.93    12.70     3.32 o
  -2  13   1    13.09    11.84     2.05 o
   3  13   1   680.66   725.24    22.56 o
  -3  13   1   679.80   599.95    20.19 o
   4  13   1    64.49    65.69     6.13 o
  -4  13   1    64.32    59.13     4.20 o
   0  14   1    19.82    18.75     3.41 o
   1  14   1    79.07    92.02     7.71 o
  -1  14   1    78.83    84.10     5.00 o
   2  14   1    36.46    37.92     3.49 o
  -2  14   1    36.36    32.55     3.33 o
   3  14   1   255.62   298.60    16.42 o
  -3  14   1   254.84   229.66     9.79 o
   4  14   1    55.89    56.92     5.79 o
   0  15   1     1.55     2.98     1.45 <
   1  15   1  1090.67  1107.60    32.93 o
  -1  15   1  1090.48  1075.20    45.46 o
   2  15   1    44.33    43.97     3.58 o
  -2  15   1    44.27    39.19     3.34 o
   3  15   1   773.14   799.52    35.05 o
   0  16   1    42.72    41.67     5.03 o
   1  16   1   482.68   534.48    25.03 o
  -1  16   1   482.87   453.34    22.15 o
   0   0   2 24355.20 24437.50   649.09 o
   1   0   2  2392.85  2179.78    84.39 o
  -1   0   2  2395.13  2248.54    87.80 o
   2   0   2 38977.50 41778.00  1084.99 o
  -2   0   2 38986.80 39815.80  1051.29 o
   3   0   2  1783.80  1628.77    66.14 o
  -3   0   2  1784.17  1800.40    40.55 o
  -4   0   2  6774.46  6837.08   149.59 o
  -5   0   2   776.12   797.11    19.47 o
  -6   0   2  4403.95  4933.80   129.73 o
  -7   0   2   100.14   122.02     9.04 o
   0   1   2    15.84    20.88     1.00 o
   1   1   2   239.43   244.85     7.80 o
  -1   1   2   240.60   257.69     6.56 o
   2   1   2  1490.59  1515.49    34.14 o
  -2   1   2  1491.47  1512.48    25.99 o
   3   1   2   877.20   860.31    25.24 o
  -3   1   2   878.17   856.51    16.01 o
   4   1   2   651.03   613.96    27.59 o
  -4   1   2   650.30   672.39    14.05 o
  -5   1   2   305.23   310.22     6.93 o
  -6   1   2  1029.35  1111.90    22.50 o
  -7   1   2   173.85   200.76     8.62 o
   0   2   2     9.30    15.59     0.91 o
   1   2   2   321.95   322.37    10.14 o
  -1   2   2   321.98   329.87     8.36 o
   2   2   2  1620.61  1660.02    45.67 o
  -2   2   2  1621.32  1697.52    37.72 o
   3   2   2   531.49   524.78    23.57 o
  -3   2   2   531.21   529.65     9.32 o
   4   2   2   170.32   159.79     9.76 o
  -4   2   2   170.56   182.54     4.30 o
  -5   2   2    49.38    50.02     2.38 o
  -6   2   2   828.01   926.97    22.15 o
  -7   2   2    65.08    73.36     6.88 o
   0   3   2  1292.53  1344.66    29.89 o
   1   3   2   313.55   316.90     7.98 o
  -1   3   2   314.39   336.14     7.07 o
   2   3   2   832.16   851.44    24.05 o
  -2   3   2   832.43   822.16    15.16 o
  -3   3   2   166.83   172.40     4.81 o
   4   3   2   269.22   258.93     9.62 o
  -4   3   2   271.04   249.11     7.53 o
  -5   3   2    63.08    60.33     2.66 o
   6   3   2   118.91   106.85     8.05 o
  -6   3   2   118.83   122.87     9.02 o
  -7   3   2    64.20    70.55     6.63 o
   0   4   2   317.06   304.27     7.06 o
   1   4   2  1212.48  1143.45    27.02 o
  -1   4   2  1212.29  1173.78    23.83 o
   2   4   2   156.38   148.63     4.67 o
  -2   4   2   156.53   144.37     4.12 o
   3   4   2   875.70   875.83    20.89 o
  -3   4   2   874.82   845.17    16.20 o
   4   4   2    35.32    35.79     2.90 o
  -4   4   2    35.11    37.15     2.04 o
   5   4   2   109.26    96.12     7.46 o
  -5   4   2   108.67   110.69     3.82 o
   6   4   2   218.95   185.43    11.57 o
  -6   4   2   218.71   224.72     9.42 o
  -7   4   2     9.91    10.74     2.13 o
   0   5   2   195.03   185.46     5.63 o
   1   5   2   324.73   318.22     7.49 o
  -1   5   2   325.05   312.76     7.39 o
   2   5   2   713.79   725.77    15.03 o
  -2   5   2   714.62   701.52    14.92 o
   3   5   2   672.26   671.90    16.55 o
  -3   5   2   672.49   647.17    16.22 o
   4   5   2  1048.67  1021.69    30.18 o
  -4   5   2  1047.15  1042.48    24.96 o
   5   5   2   207.85   197.19    11.81 o
  -5   5   2   207.51   203.33     6.77 o
   6   5   2   860.22   745.39    33.88 o
  -6   5   2   860.11   896.46    27.48 o
  -7   5   2   109.72   140.17     7.01 o
   0   6   2 12872.60 12192.70   274.64 o
   1   6   2  1256.92  1184.20    34.74 o
  -1   6   2  1257.90  1205.89    25.01 o
   2   6   2 14648.40 14998.80   278.82 o
  -2   6   2 14647.70 14283.30   275.15 o
   3   6   2  1033.74  1004.76    42.32 o
  -3   6   2  1033.86  1011.58    24.30 o
   4   6   2  4484.46  4283.28   118.74 o
  -4   6   2  4484.21  4365.87   120.49 o
   5   6   2   431.25   420.87    20.68 o
  -5   6   2   430.86   498.35    12.73 o
   6   6   2  2382.02  2065.28    85.13 o
  -6   6   2  2380.65  2370.91    67.34 o
   7   6   2    52.82    46.44     4.96 o
   0   7   2   856.71   877.92    20.75 o
   1   7   2   261.17   248.79     6.44 o
  -1   7   2   261.93   249.21     9.13 o
   2   7   2  1119.39  1178.94    27.05 o
  -2   7   2  1119.66  1105.13    32.38 o
   3   7   2   395.94   392.09    13.07 o
  -3   7   2   396.61   387.13    13.29 o
   4   7   2   796.92   834.80    34.72 o
  -4   7   2   798.17   806.03    19.87 o
   5   7   2   264.91   264.01    13.90 o
  -5   7   2   265.24   243.30     9.95 o
   6   7   2   815.85   691.30    31.81 o
  -6   7   2   815.91   779.87    35.85 o
   7   7   2   144.14   132.68     9.76 o
   0   8   2   257.56   282.53     7.96 o
   1   8   2    46.19    56.49     2.85 o
  -1   8   2    46.44    44.99     3.07 o
   2   8   2   653.24   699.38    21.00 o
  -2   8   2   653.97   646.42    16.28 o
   3   8   2   191.15   200.18     7.87 o
  -3   8   2   191.28   183.73     6.20 o
   4   8   2   437.72   434.44    14.60 o
  -4   8   2   438.45   428.38    11.94 o
   5   8   2    63.22    55.04     5.56 o
  -5   8   2    63.16    53.51     4.04 o
   6   8   2   735.19   707.38    31.88 o
  -6   8   2   736.84   745.79    23.88 o
   0   9   2   380.26   415.78    13.53 o
   1   9   2    91.85   104.81     5.13 o
  -1   9   2    92.24    96.80     3.98 o
   2   9   2   466.11   502.57    15.99 o
  -2   9   2   466.30   461.48    12.41 o
   3   9   2   172.83   189.52     7.73 o
  -3   9   2   173.12   173.33     6.13 o
   4   9   2   271.52   263.85    10.11 o
  -4   9   2   272.37   255.66    10.17 o
   5   9   2    64.58    61.43     5.89 o
  -5   9   2    64.57    56.15     4.21 o
   6   9   2   113.60   102.42     7.71 o
  -6   9   2   113.54   101.14     6.11 o
   0  10   2   775.60   792.51    24.07 o
   1  10   2   634.53   660.95    20.58 o
  -1  10   2   634.47   658.73    16.63 o
   2  10   2   616.57   661.77    29.49 o
  -2  10   2   616.49   611.82    15.90 o
   3  10   2   537.05   570.16    26.15 o
  -3  10   2   536.43   515.61    14.27 o
  -4  10   2   228.32   215.18     9.12 o
   5  10   2   134.37   128.50     8.97 o
  -5  10   2   133.82   126.79     6.68 o
   6  10   2   212.80   194.20    11.93 o
  -6  10   2   212.26   197.79    13.18 o
   0  11   2    33.16    39.62     3.30 o
   1  11   2   222.60   220.04     8.88 o
  -1  11   2   222.70   223.27     9.03 o
   2  11   2   197.81   203.58     8.40 o
  -2  11   2   197.67   200.26    12.00 o
   3  11   2   233.80   254.38     9.83 o
  -3  11   2   233.61   237.50    13.36 o
   4  11   2   640.03   585.60    27.26 o
  -4  11   2   639.77   553.98    19.12 o
   5  11   2   103.68    90.58     7.20 o
  -5  11   2   103.36    89.39     5.43 o
   0  12   2  2887.56  3051.86   118.79 o
   1  12   2   333.32   350.27    12.58 o
  -1  12   2   333.35   351.30    12.57 o
   2  12   2  1919.97  1993.12    55.97 o
  -2  12   2  1919.49  1943.67    77.91 o
   3  12   2   295.51   316.85    16.60 o
  -3  12   2   295.40   281.40    11.43 o
   4  12   2  1371.11  1264.73    53.15 o
  -4  12   2  1370.96  1240.01    52.63 o
   5  12   2    99.82    95.01     7.60 o
   0  13   2   706.87   731.76    22.81 o
   1  13   2    71.81    72.77     4.68 o
  -1  13   2    72.06    68.25     4.45 o
   2  13   2   876.15   962.97    28.76 o
  -2  13   2   876.55   915.64    27.71 o
   3  13   2   114.53   129.69     8.98 o
  -3  13   2   114.83   119.81     8.76 o
   4  13   2   598.18   577.83    26.63 o
  -4  13   2   599.17   520.79    18.36 o
   0  14   2   191.63   175.63     8.02 o
   1  14   2    26.49    27.01     2.98 o
  -1  14   2    26.68    30.67     3.40 o
   2  14   2    24.17    18.32     3.59 o
  -2  14   2    24.36    20.88     2.56 o
   3  14   2    53.83    55.13     5.45 o
  -3  14   2    53.93    51.81     4.01 o
   0  15   2   874.80   969.75    28.59 o
   1  15   2    42.04    43.71     5.02 o
  -1  15   2    42.22    41.41     5.03 o
   2  15   2   467.58   483.93    23.09 o
  -2  15   2   467.66   378.25    19.59 o
  -1  16   2   186.96   158.58    10.85 o
   0   0   3    67.77    67.57     3.07 o
   1   0   3   233.21   224.59     7.57 o
  -1   0   3   232.64   257.50    11.02 o
   2   0   3   322.16   339.36    10.60 o
   3   0   3    40.60    41.92     4.43 o
  -3   0   3    40.11    44.65     2.11 o
   4   0   3   209.80   267.43    14.22 o
  -4   0   3   210.68   218.84    10.61 o
  -5   0   3    60.63    63.57     3.05 o
  -6   0   3   493.55   525.63    24.54 o
  -7   0   3    48.93    48.99     5.37 o
   0   1   3    11.21    10.57     1.02 o
   1   1   3   116.69   114.45     3.51 o
  -1   1   3   117.08   118.88     3.56 o
   2   1   3    81.23    92.20     3.42 o
  -2   1   3    81.48   100.89     3.62 o
   3   1   3   272.64   293.54     9.81 o
  -3   1   3   273.20   278.19     7.37 o
   4   1   3   480.94   414.37    20.50 o
  -4   1   3   482.06   449.64    10.28 o
   5   1   3   349.17   325.49    17.17 o
  -5   1   3   349.64   349.43     8.44 o
  -6   1   3   237.29   242.02     9.60 o
  -7   1   3   192.15   215.16    12.85 o
   0   2   3  3025.12  2995.59    81.28 o
   1   2   3   177.06   168.32     4.10 o
  -1   2   3   176.85   179.06     6.63 o
   2   2   3   807.66   794.91    23.49 o
  -2   2   3   806.75   805.11    19.55 o
   3   2   3   418.83   418.29    19.86 o
  -3   2   3   418.77   407.89    13.22 o
   4   2   3   801.68   807.29    24.34 o
  -4   2   3   800.80   815.42    16.61 o
   5   2   3   754.55   672.31    30.77 o
  -5   2   3   754.06   740.36    16.11 o
  -6   2   3   275.31   304.75    11.30 o
  -7   2   3   432.49   479.41    16.18 o
   0   3   3  5964.39  5699.01   112.11 o
   1   3   3 14201.10 14043.00   310.82 o
  -1   3   3 14200.90 14188.00   268.25 o
   2   3   3  3111.12  3025.69    83.72 o
  -2   3   3  3109.95  2965.18    59.47 o
   3   3   3  7046.31  7123.89   191.26 o
  -3   3   3  7045.81  6976.90   188.59 o
   4   3   3   888.25   896.09    26.79 o
   5   3   3  3398.89  2990.91   120.49 o
  -5   3   3  3399.33  3315.06    92.31 o
   6   3   3   370.02   324.28    17.20 o
  -6   3   3   369.89   380.28    19.04 o
  -7   3   3  1350.88  1635.22    45.51 o
   0   4   3   510.80   502.63    10.93 o
   1   4   3  1076.74  1067.00    21.46 o
  -1   4   3  1077.42  1034.79    21.63 o
  -2   4   3  1458.68  1399.82    29.03 o
   3   4   3  1132.20  1146.03    33.23 o
  -3   4   3  1132.26  1084.18    32.09 o
   4   4   3   261.76   279.11    10.36 o
  -4   4   3   262.09   256.01    13.75 o
   5   4   3   826.14   744.30    33.50 o
  -5   4   3   826.24   813.35    25.26 o
   6   4   3   111.96    93.90     7.56 o
  -6   4   3   111.48   123.13     8.82 o
   0   5   3   387.51   354.11     8.57 o
   1   5   3   961.84   908.22    22.10 o
  -1   5   3   961.99   970.57    19.94 o
  -2   5   3    94.37   101.83     4.04 o
   3   5   3  1092.88  1141.26    32.91 o
  -3   5   3  1094.07  1061.45    31.51 o
   4   5   3   113.25    99.53     7.63 o
  -4   5   3   113.41   107.88     8.29 o
   5   5   3   844.11   783.35    34.82 o
   6   5   3   365.05   308.69    16.58 o
  -6   5   3   365.99   369.10    18.73 o
   0   6   3   510.17   466.51    15.12 o
   1   6   3   329.70   335.06     7.95 o
  -1   6   3   329.54   358.33    11.36 o
   2   6   3   154.14   154.07     5.97 o
  -2   6   3   154.81   176.40     5.36 o
   3   6   3   115.13   117.51     8.17 o
  -3   6   3   114.71   118.79     5.69 o
   4   6   3   141.45   168.13    10.46 o
  -4   6   3   141.62   149.98     6.85 o
  -6   6   3   293.13   318.81    16.66 o
   0   7   3     1.99     3.58     1.02 o
   1   7   3   360.96   353.89     9.79 o
  -1   7   3   360.70   356.20    11.63 o
   2   7   3   704.24   698.96    21.02 o
  -2   7   3   703.74   701.02    17.25 o
   3   7   3    73.43    77.80     4.41 o
  -3   7   3    73.26    74.56     3.23 o
   4   7   3   420.66   398.47    19.90 o
  -4   7   3   422.22   402.96    14.21 o
   5   7   3     0.18     0.26     1.28 <
  -5   7   3     0.18    -0.17     1.19 <
   6   7   3   183.49   156.71    10.09 o
  -6   7   3   183.13   208.86    12.33 o
   0   8   3  1241.48  1258.51    29.41 o
   1   8   3    49.09    54.62     2.87 o
  -1   8   3    48.79    52.32     2.88 o
   2   8   3   308.26   313.98    10.95 o
  -2   8   3   308.55   315.34     8.89 o
   3   8   3   157.79   154.49     6.41 o
  -3   8   3   157.51   153.73     6.42 o
   4   8   3   602.47   585.01    27.04 o
   5   8   3   477.17   430.07    21.23 o
  -5   8   3   476.50   441.33    15.78 o
   6   8   3   376.02   327.35    17.05 o
   0   9   3  1715.39  1714.59    39.77 o
   1   9   3  4146.39  4090.79   157.90 o
  -1   9   3  4146.32  4126.46    92.25 o
   2   9   3   447.46   476.89    15.45 o
  -2   9   3   447.38   475.10    15.03 o
   3   9   3  2512.98  2521.31    69.92 o
  -3   9   3  2511.98  2324.62    94.16 o
   4   9   3   402.85   376.28    18.98 o
  -4   9   3   402.24   350.89    18.93 o
  -5   9   3  1297.11  1085.59    48.60 o
   0  10   3     0.50     1.53     1.36 <
   1  10   3  1150.13  1178.62    34.45 o
  -1  10   3  1150.85  1181.75    27.97 o
   2  10   3   350.73   390.16    13.43 o
  -2  10   3   349.86   354.89    10.18 o
  -3  10   3  1072.11  1066.31    32.11 o
   4  10   3   209.56   230.26    13.46 o
  -4  10   3   210.33   198.04     8.94 o
   5  10   3   725.71   673.69    30.41 o
  -5  10   3   726.14   668.06    22.31 o
   0  11   3   153.11   156.88     7.22 o
   1  11   3   511.33   503.58    16.85 o
  -1  11   3   511.48   501.79    16.95 o
  -2  11   3     5.60     6.22     1.70 o
   3  11   3   629.61   672.73    30.27 o
  -3  11   3   630.31   599.92    20.11 o
  -4  11   3    11.57     8.18     2.05 o
  -5  11   3   497.37   447.38    23.45 o
   0  12   3   717.77   705.68    22.61 o
   1  12   3   444.32   476.36    15.95 o
  -1  12   3   444.46   462.55    15.71 o
   2  12   3   137.31   151.68    10.00 o
  -2  12   3   137.26   137.36     6.90 o
   3  12   3   288.49   317.27    16.65 o
  -3  12   3   288.32   272.70    10.85 o
  -4  12   3   215.93   202.99     9.11 o
   0  13   3   105.04   105.32     5.88 o
   1  13   3   474.89   503.71    23.79 o
  -1  13   3   474.56   506.45    17.06 o
   2  13   3   466.15   525.87    24.91 o
  -2  13   3   465.67   487.01    23.41 o
   3  13   3   247.05   250.79    13.96 o
  -3  13   3   246.80   237.08     9.86 o
   0  14   3   174.93   179.37     8.41 o
   1  14   3    24.41    28.12     4.08 o
  -1  14   3    24.32    21.39     2.82 o
   2  14   3   123.33   132.25     9.08 o
  -2  14   3   123.52   122.87     9.20 o
  -3  14   3   108.96   119.97     9.68 o
  -2  15   3    28.39    24.11     4.27 o
   0   0   4 11580.00 11475.20   434.78 o
   1   0   4  3646.55  3423.09    95.31 o
  -1   0   4  3645.10  3584.27    97.90 o
   2   0   4  3667.31  3755.38   142.50 o
  -2   0   4  3669.18  3702.39   100.26 o
   3   0   4  2645.15  2374.67    96.00 o
   4   0   4  6071.29  5949.05   229.67 o
  -4   0   4  6072.12  6127.80   166.44 o
  -5   0   4   893.21   896.94    38.51 o
   0   1   4  2205.97  2139.37    42.60 o
   1   1   4   232.25   216.23     5.54 o
  -1   1   4   233.11   215.19     7.56 o
   2   1   4   480.96   502.52    15.42 o
  -2   1   4   480.05   496.49    12.62 o
   3   1   4   402.97   417.07    13.35 o
  -3   1   4   403.85   359.60    12.30 o
   4   1   4   613.54   598.94    27.62 o
  -4   1   4   612.86   620.43    18.94 o
   5   1   4   627.44   581.02    27.38 o
  -5   1   4   627.77   624.83    28.23 o
   0   2   4  2769.98  2765.11    62.12 o
   1   2   4   291.72   297.80     7.61 o
  -1   2   4   291.79   293.11     7.06 o
   2   2   4   458.79   488.88    21.13 o
  -2   2   4   458.69   461.43    14.64 o
   3   2   4    58.93    68.34     6.02 o
  -3   2   4    58.71    57.69     3.50 o
   4   2   4   892.84   936.65    27.49 o
  -5   2   4   153.99   180.23    11.66 o
  -6   2   4   303.10   360.48    13.07 o
   0   3   4   323.77   293.21     8.48 o
   1   3   4   140.21   136.86     3.70 o
  -1   3   4   139.62   134.73     4.13 o
   2   3   4   110.60    92.97     4.78 o
  -2   3   4   110.47   104.64     5.23 o
   3   3   4   182.47   184.84     7.48 o
  -3   3   4   182.91   175.80     7.21 o
   4   3   4   551.22   574.27    18.22 o
  -4   3   4   551.20   541.28    17.47 o
   5   3   4    54.33    56.92     5.79 o
   6   3   4    99.91    81.97     6.96 o
  -6   3   4    99.20    96.46     7.51 o
   0   4   4   316.16   302.32     7.40 o
   1   4   4  1292.83  1273.80    25.59 o
  -1   4   4  1292.30  1256.34    25.98 o
   2   4   4    30.78    33.23     2.80 o
  -2   4   4    30.88    30.08     2.13 o
   3   4   4   426.67   422.85    14.26 o
  -3   4   4   425.67   390.13    13.58 o
   4   4   4    52.46    58.62     3.90 o
  -4   4   4    52.47    56.32     5.53 o
   5   4   4   124.84   104.55     8.00 o
  -5   4   4   124.22   108.90     7.98 o
   6   4   4   131.84   119.55     8.57 o
  -6   4   4   132.38   138.98     9.35 o
   0   5   4   728.42   711.81    17.83 o
   1   5   4   704.36   697.63    14.84 o
  -1   5   4   704.66   707.42    21.38 o
   2   5   4   172.34   174.10     7.32 o
  -2   5   4   171.34   166.09     7.28 o
   3   5   4   481.69   478.61    16.05 o
  -3   5   4   481.30   464.55    22.26 o
   4   5   4   266.24   261.97    14.59 o
  -4   5   4   265.79   324.27    12.32 o
   5   5   4   489.10   466.82    22.71 o
  -5   5   4   489.03   497.59    23.48 o
   6   5   4   159.13   134.55     9.30 o
  -6   5   4   158.33   168.04    10.61 o
   0   6   4  5069.64  4879.93   110.34 o
   1   6   4  2211.38  2298.66    50.88 o
  -1   6   4  2210.73  2218.46    50.54 o
   2   6   4  2750.43  2689.65   106.50 o
  -2   6   4  2751.76  2675.40    75.04 o
   3   6   4  1520.86  1456.22    60.40 o
  -3   6   4  1521.06  1432.33    42.37 o
   4   6   4  3269.65  3217.44   126.68 o
   5   6   4   546.38   505.36    24.19 o
  -5   6   4   546.04   521.05    24.52 o
   6   6   4  1180.78  1114.48    48.51 o
  -6   6   4  1181.10  1314.86    54.51 o
   0   7   4  1894.47  1935.45    43.91 o
   1   7   4   128.49   122.88     5.57 o
  -1   7   4   129.04   127.14     6.15 o
   2   7   4  1203.81  1242.66    51.61 o
  -2   7   4  1203.47  1232.01    35.90 o
   3   7   4   448.98   452.34    22.06 o
  -3   7   4   450.15   439.28    15.17 o
   4   7   4   640.73   663.52    29.96 o
  -4   7   4   639.93   679.73    30.28 o
  -5   7   4   429.41   425.80    20.82 o
   0   8   4  1707.44  1711.04    39.64 o
   1   8   4    28.95    28.37     2.64 o
  -1   8   4    29.14    29.91     2.98 o
   2   8   4   907.52   965.19    41.09 o
  -2   8   4   907.17   939.62    28.19 o
   3   8   4    86.71    96.97     7.81 o
  -3   8   4    87.00    79.16     4.89 o
   4   8   4   790.77   778.86    34.51 o
   5   8   4   210.47   181.85    11.21 o
  -5   8   4   210.80   205.03    12.21 o
   0   9   4    94.84    98.33     4.41 o
   1   9   4   128.24   138.04     6.34 o
  -1   9   4   128.33   137.19     6.60 o
   2   9   4   103.74   111.37     8.32 o
  -2   9   4   104.12    93.13     7.71 o
   3   9   4   131.67   135.40     9.44 o
  -3   9   4   131.96   129.18     6.58 o
   4   9   4   262.33   248.41    14.04 o
   5   9   4    93.17    81.80     6.85 o
  -5   9   4    93.52    95.60     7.58 o
   0  10   4    42.14    42.69     3.49 o
   1  10   4  1104.96  1134.55    33.33 o
  -1  10   4  1104.41  1198.95    34.90 o
   2  10   4    75.58    82.91     7.14 o
  -2  10   4    75.61    72.94     4.78 o
   3  10   4   540.61   592.72    27.32 o
   4  10   4    72.69    78.14     6.63 o
  -4  10   4    72.71    72.26     4.94 o
   0  11   4    77.00    66.55     6.42 o
   1  11   4   389.79   399.63    19.98 o
  -1  11   4   389.50   406.28    14.88 o
   2  11   4   165.07   170.60    10.97 o
  -2  11   4   164.57   155.43     7.55 o
   3  11   4   315.07   319.66    16.85 o
  -3  11   4   314.64   289.07    11.60 o
  -4  11   4    74.18    68.00     6.49 o
   1  12   4   650.27   674.09    30.55 o
  -1  12   4   650.21   686.02    21.87 o
   2  12   4  1013.04  1001.83    43.04 o
  -2  12   4  1013.51   980.08    30.64 o
   3  12   4   389.27   389.73    19.43 o
  -3  12   4   388.75   349.09    19.29 o
   0  13   4  1154.18  1234.70    51.60 o
   1  13   4   107.89   112.39     8.51 o
  -1  13   4   108.17   119.21     9.08 o
   2  13   4   738.66   819.20    35.67 o
  -2  13   4   738.54   824.75    25.37 o
  -3  13   4   223.69   217.98    13.15 o
   0   0   5    62.53    63.99     3.66 o
   1   0   5   164.00   159.01     6.51 o
  -1   0   5   163.53   157.14     9.57 o
   2   0   5   121.18   123.82     5.27 o
  -2   0   5   121.92   121.00     5.71 o
  -4   0   5   283.88   288.90    15.23 o
  -5   0   5    81.86    86.40     7.31 o
   0   1   5     2.24     2.30     0.77 o
   1   1   5   504.23   490.49    10.82 o
  -1   1   5   504.47   494.41    13.06 o
   2   1   5   147.87   139.58     5.17 o
  -2   1   5   148.42   143.41     7.78 o
  -3   1   5   584.92   614.60    18.84 o
   4   1   5    75.70    79.93     7.15 o
  -4   1   5    75.81    72.43     6.23 o
  -5   1   5   254.32   242.45     9.63 o
   0   2   5   270.53   265.14     6.71 o
   1   2   5   736.73   756.02    15.53 o
  -1   2   5   737.12   768.37    18.59 o
   2   2   5   775.98   734.26    22.79 o
  -2   2   5   775.70   768.03    23.17 o
   3   2   5   585.24   585.36    18.75 o
  -3   2   5   584.84   604.12    25.71 o
   4   2   5   376.62   368.77    19.22 o
  -4   2   5   376.16   436.54    21.51 o
   5   2   5   195.73   179.55    11.57 o
  -5   2   5   195.45   183.81    11.22 o
   0   3   5  3225.56  3043.45    85.36 o
   1   3   5  4748.63  4530.25   125.88 o
  -1   3   5  4748.57  4720.05   105.16 o
   2   3   5  2940.83  2820.81    79.40 o
  -2   3   5  2939.93  2937.50    81.08 o
   3   3   5  3718.84  3762.07   102.98 o
  -3   3   5  3719.01  3512.95   137.56 o
  -4   3   5  1533.92  1633.48    66.24 o
   5   3   5  1978.90  1761.84    73.30 o
  -5   3   5  1979.30  1834.34    76.13 o
   0   4   5   302.78   272.21    10.03 o
   1   4   5  1106.86  1100.60    32.64 o
  -1   4   5  1106.44  1107.86    32.31 o
   2   4   5   157.28   152.19     6.93 o
  -2   4   5   157.59   163.18     7.04 o
   3   4   5   917.62   954.54    28.58 o
  -3   4   5   918.19   928.09    27.96 o
   4   4   5   188.21   188.32    11.93 o
  -4   4   5   187.37   197.70    11.80 o
   5   4   5   357.29   317.71    17.25 o
  -5   4   5   356.91   325.73    16.95 o
   0   5   5   199.49   196.77     6.33 o
   1   5   5   897.33   926.03    39.82 o
  -1   5   5   898.51   935.96    22.62 o
   2   5   5    46.69    47.97     5.28 o
  -2   5   5    46.73    48.91     3.57 o
   3   5   5   833.40   843.11    37.20 o
  -3   5   5   833.72   876.27    26.83 o
   4   5   5   217.63   213.04    12.80 o
   5   5   5   601.50   550.22    26.21 o
  -5   5   5   602.19   583.62    26.96 o
   0   6   5     7.65     9.12     1.45 o
  -1   6   5    42.64    46.44     3.57 o
   2   6   5    97.34   111.46     8.56 o
  -2   6   5    97.71   100.29     5.44 o
  -3   6   5    60.18    64.42     4.33 o
   4   6   5   165.45   161.74    10.67 o
  -4   6   5   166.05   166.59    10.65 o
   5   6   5    99.83    86.91     7.20 o
  -5   6   5    99.19    85.72     7.12 o
   0   7   5   539.45   524.22    16.75 o
   1   7   5    21.16    24.54     3.91 o
  -1   7   5    20.97    23.01     2.72 o
   2   7   5   137.60   138.05     9.80 o
  -2   7   5   138.48   140.94     6.89 o
   3   7   5   133.63   134.63     9.54 o
  -3   7   5   134.05   138.30     9.53 o
  -4   7   5   334.22   385.89    19.69 o
  -5   7   5     6.31     6.05     2.64 <
   0   8   5   121.07   126.88     4.99 o
   1   8   5   418.36   469.45    22.83 o
  -1   8   5   418.65   427.68    14.85 o
  -2   8   5   636.11   672.99    30.90 o
   3   8   5   341.15   336.46    17.84 o
  -3   8   5   340.53   347.80    13.07 o
   4   8   5   399.97   393.06    19.81 o
  -4   8   5   399.96   394.85    19.71 o
   0   9   5   656.60   717.75    32.47 o
  -1   9   5  1662.76  1639.57    47.81 o
   2   9   5  1142.20  1191.24    50.18 o
  -2   9   5  1141.95  1111.52    33.95 o
  -3   9   5  1346.52  1373.45    40.87 o
   4   9   5   369.59   351.55    18.25 o
  -4   9   5   369.54   363.82    18.78 o
   0  10   5    18.09    17.21     3.66 o
   1  10   5  1036.83  1175.79    49.21 o
  -1  10   5  1036.21  1118.26    33.40 o
   2  10   5   235.14   253.86    14.66 o
  -2  10   5   235.65   219.77     9.64 o
   3  10   5   896.13   896.88    39.04 o
  -3  10   5   896.73   920.74    40.01 o
  -4  10   5    37.19    36.89     4.77 o
   0  11   5    48.01    54.45     6.03 o
  -1  11   5   461.03   457.51    23.12 o
  -2  11   5     7.27     7.75     2.81 <
   0  12   5    70.55    71.32     6.90 o
   1  12   5    94.45   104.55     8.32 o
  -1  12   5    94.20    91.77     8.02 o
  -2  12   5   318.98   290.61    17.18 o
   0   0   6   556.03   543.24    17.75 o
   1   0   6  2781.74  2662.48   106.27 o
  -1   0   6  2782.85  2884.38   111.68 o
   2   0   6  2231.21  2109.81    85.99 o
   3   0   6  1495.76  1520.77    64.15 o
  -4   0   6   739.95   676.00    30.65 o
  -5   0   6   902.39   857.65    37.36 o
   0   1   6   814.84   808.93    20.01 o
   1   1   6    19.27    18.06     1.79 o
  -1   1   6    19.16    21.39     2.30 o
  -2   1   6  1181.89  1215.24    50.36 o
   3   1   6   153.84   140.94    10.19 o
  -3   1   6   153.98   154.75    10.05 o
   4   1   6   238.45   239.29    14.40 o
  -4   1   6   238.02   237.42    13.47 o
  -5   1   6   191.82   176.90     7.76 o
   0   2   6   660.84   665.95    16.83 o
   1   2   6    38.39    38.68     3.32 o
  -1   2   6    38.49    42.18     3.23 o
   2   2   6  1368.83  1344.18    56.62 o
  -2   2   6  1368.77  1385.12    56.95 o
   3   2   6    95.96    97.65     8.17 o
  -3   2   6    96.16    95.78     7.58 o
   4   2   6   505.20   494.52    24.43 o
  -4   2   6   505.77   476.70    22.92 o
  -5   2   6   150.79   144.18     9.57 o
   0   3   6    41.35    40.22     2.56 o
   1   3   6    27.29    26.92     2.81 o
  -1   3   6    27.51    30.08     3.91 o
   2   3   6   359.26   352.16    12.84 o
  -2   3   6   359.60   374.40    18.84 o
  -3   3   6    63.95    70.81     6.63 o
   4   3   6   209.98   208.95    13.04 o
  -4   3   6   209.09   219.35    12.74 o
  -5   3   6    71.15    73.28     6.47 o
   0   4   6   160.58   157.73     5.73 o
  -1   4   6   183.86   186.11     8.00 o
   2   4   6   340.72   355.73    18.85 o
  -2   4   6   341.05   339.62    17.48 o
   3   4   6    49.74    43.88     5.38 o
  -3   4   6    49.52    46.86     5.20 o
  -4   4   6   326.06   313.19    16.60 o
   0   5   6   234.77   244.58    14.27 o
   1   5   6   288.66   295.63    16.50 o
  -1   5   6   288.20   295.12    11.12 o
   2   5   6   527.61   541.93    26.09 o
  -2   5   6   527.44   588.89    27.79 o
   3   5   6   241.76   243.38    14.39 o
  -3   5   6   241.67   252.33    14.35 o
   4   5   6    57.01    56.41     6.05 o
  -4   5   6    56.76    53.25     5.63 o
   0   6   6   594.15   600.00    28.35 o
   1   6   6  1669.51  1745.35    71.43 o
   2   6   6  1269.22  1282.61    54.50 o
  -2   6   6  1269.69  1283.44    54.58 o
   3   6   6   881.35   863.62    38.56 o
  -3   6   6   880.54   867.90    38.27 o
   4   6   6   713.17   674.20    31.34 o
   0   7   6  1322.15  1495.01    61.53 o
   1   7   6   130.63   139.15    10.54 o
   2   7   6  1117.74  1212.51    51.18 o
  -2   7   6  1116.83  1154.55    48.71 o
   3   7   6   179.56   186.28    11.99 o
  -3   7   6   179.92   180.57    11.76 o
  -4   7   6   518.02   508.67    24.34 o
   1   8   6   110.64   119.12     9.52 o
  -1   8   6   110.81   123.21     9.67 o
   2   8   6  1210.35  1276.53    53.74 o
   3   8   6   224.73   220.71    13.48 o
   0   9   6    14.54    13.46     3.41 o
   1   9   6    46.30    46.61     5.71 o
  -1   9   6    46.26    47.54     5.96 o
   2   9   6   106.95   107.96     8.69 o
   0  10   6     4.11     4.09     2.39 <
   1  10   6   457.33   518.96    25.25 o
   0  11   6   205.56   228.80    14.39 o
  -1   0   7   131.71   131.06     9.55 o
  -2   0   7   164.07   169.74    10.88 o
  -3   0   7    69.50    68.93     6.39 o
  -4   0   7    85.19    90.41     7.31 o
  -2   1   7    17.01    16.96     3.41 o
   3   1   7   303.68   287.45    16.86 o
  -3   1   7   303.60   292.48    16.08 o
  -4   1   7    33.17    32.63     3.07 o
   2   2   7    42.96    42.60     5.62 o
  -2   2   7    42.96    51.63     5.95 o
   3   2   7   417.31   428.95    22.36 o
  -3   2   7   417.06   387.44    19.93 o
   4   2   7   142.64   143.24    10.99 o
  -4   2   7   142.37   152.70    10.61 o
   2   3   7  1495.89  1488.31    62.91 o
   3   3   7  1336.55  1484.73    62.46 o
   2   4   7    48.40    56.32     6.29 o
   2   5   7   376.92   392.97    20.89 o
   3   5   7   492.82   513.95    25.71 o
   2   6   7    77.79    87.85     8.58 o
   2   7   7   234.99   273.03    16.11 o
